# Supplementary material for: Aggregatibacter actinomycetemcomitans and Filifactor alocis as Associated with Periodontal Attachment Loss in a Cohort of Ghanaian Adolescents
Source: MDPI journal article supplement (doi:10.3390/microorganisms10122511), 2022-12-19
Supplement: s1 [file s1]

Table S1

**a.** Primers used for qPCR - based quantification of *Aggregatibacter actinomycetemcomitans* and *Filifactor alocis* in accordance to Kirakodu et al. [18] and Siquiera & Rocas [19].

**b.** Cycle settings for quantification of *A. actinomycetemcomitans* and *F. alocis* in accordance to Kirakodu et al. [18] and Siquiera & Rocas [19].

| <b>a</b>                              | Forward                | Reverse               |
|---------------------------------------|------------------------|-----------------------|
| Kirakodu<br><i>Aa</i> ( <i>ItxA</i> ) | CTAGGTATTGCGAAACAATTTG | CCTGAAATTAAGCTGGTAATC |
| Siquiera and Rocas<br><i>Fa</i>       | AGGCAGCTTGCCATACTGCG   | ACTGTTAGCAACTACCGATGT |

| <b>b</b>     | Kirakodu ( <i>Aa</i> ) | Siquiera and Rocas ( <i>Fa</i> ) |
|--------------|------------------------|----------------------------------|
| Hold/time    | 95°/10 min             | 95°/2 min                        |
| Cycling/time | 95°/10 s               | 95°/30 s                         |
| Cycling/time | 55°/5 s                | 55°/1 min (72°/2 min)            |
| Cycling/time | 72°/10 s               | 72°/2 min                        |
| Cycles       | 45                     | 40                               |

Table S2

**a.** Primers used for detection of the *ltx* promoter gene of *A. actinomycescomitans* and the *ftxA* gene of *F. alocis* in accordance to Poulsen et. al. [20] and Oscarsson et al. [15].

**b.** Cycle settings for detection of the *ltx promoter gene* of *A. actinomycescomitans* and the *ftxA* gene of *F. alocis* in accordance to Poulsen et. al. [20] and Oscarsson et al. [15].

| <b>a</b>                        | Forward                | Reverse                  |
|---------------------------------|------------------------|--------------------------|
| Poulsen<br><i>ltx- promoter</i> | GCCGACACCAAAGACAAAGTCT | GCCCATAACCAAGCCACATAC    |
| Oscarsson<br><i>ftxA</i>        | GGCTCAGATACCTACTTCTTC  | GAAGGCTATGATTTGATTGTTTCC |

| <b>b</b>     | Poulsen ( <i>ltx promoter</i> ) | Oscarsson ( <i>ftxA</i> ) |
|--------------|---------------------------------|---------------------------|
| Hold/time    | 94°/5 min                       | 95°/1 min                 |
| Cycling/time | 94°/1 min                       | 95°/30 s                  |
| Cycling/time | 60°/1 min                       | 54°/30 s                  |
| Cycling/time | 72°/2 min                       | 72°/1 min                 |
| Cycling/time | 72°/8 min                       | 72°/7 min                 |
| Cycles       | 30                              | 35                        |
